# Supplementary material for: Risk of Prevalent Asthma among Children Affected by Inflammatory Bowel Disease: A Population-Based Birth Cohort Study
Source: MDPI journal article supplement (doi:10.3390/ijerph17124255), 2020-06-15
Supplement: s1 [file s1]

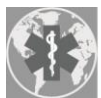

**Supplementary Table S1 Sensitivity Analysis of the Risk of Asthma at 6 Years, among Children Affected by IBD.**

| Population at Risk                     | Asthmatic Subjects | %    | OR (95% CI)      |
|----------------------------------------|--------------------|------|------------------|
| All IBD                                |                    |      |                  |
| All subjects (N=162)                   | 34                 | 21.0 | 1.42 (0.95-2.13) |
| References (N=1620)                    | 257                | 15.9 | 1                |
| Male (N=94)                            | 23                 | 24.5 | 1.52 (0.92-2.50) |
| References (N=940)                     | 166                | 17.7 | 1                |
| Female (N=68)                          | 11                 | 16.2 | 1.26 (0.63-2.50) |
| References (N=680)                     | 91                 | 13.4 | 1                |
| Type of IBD                            |                    |      |                  |
| Crohn's Disease <sup>1</sup> (N=81)    | 15                 | 18.5 | 1.24 (0.68-2.26) |
| References (N=810)                     | 126                | 15.6 | 1                |
| Ulcerative Colitis <sup>1</sup> (N=63) | 14                 | 22.2 | 1.47 (0.78-2.78) |
| References (N=630)                     | 103                | 16.4 | 1                |
| Age at IBD Diagnosis                   |                    |      |                  |
| Pediatric IBD <sup>2</sup> (N=102)     | 22                 | 21.6 | 1.25 (0.76-2.05) |
| References (N=1020)                    | 184                | 21.6 | 1                |
| EO-IBD <sup>3</sup> (N=60)             | 12                 | 20.0 | 1.88 (0.93-3.80) |
| References (N=600)                     | 73                 | 12.2 | 1                |
| VEO-IBD <sup>4</sup> (N=33)            | 6                  | 18.2 | 2.68 (0.96-7.44) |
| References (N=330)                     | 27                 | 8.2  | 1                |

<sup>1</sup> Only among 144 children with a hospital discharge record diagnosis of Crohn's disease or ulcerative colitis; <sup>2</sup> Pediatric IBD: age at IBD diagnosis between 10 and 17 years; <sup>3</sup> Early-Onset IBD: age at IBD diagnosis between 0 and 9 years; <sup>4</sup> Very Early-Onset IBD: age at IBD diagnosis between 0 and 5 years.
